# Supplementary material for: Enabling Al sacrificial anodes in tetrahydrofuran electrolytes for reductive electrosynthesis
Source: Royal Society of Chemistry journal article supplement (doi:10.1039/d3sc04725c), 2023-01-01
Supplement: d3sc04725c1.pdf [file d3sc04725c1.pdf]

# ***Enabling Al Sacrificial Anode in Tetrahydrofuran Electrolytes for Reductive Electrosynthesis***

Wendy Zhang,<sup>†</sup> Weiyang Guan,<sup>‡</sup> Yi Wang,<sup>‡</sup> Song Lin,<sup>‡</sup> and  
Kimberly A. See<sup>\*,†</sup>

<sup>†</sup>*Division of Chemistry and Chemical Engineering, California Institute of Technology, Pasadena,  
California 91125, United States*

<sup>‡</sup>*Department of Chemistry and Chemical Biology, Cornell University, Ithaca, New York 14853,  
United States*

E-mail: [ksee@caltech.edu](mailto:ksee@caltech.edu)

# Supporting Information

## Linear sweep voltammograms of Al stripping

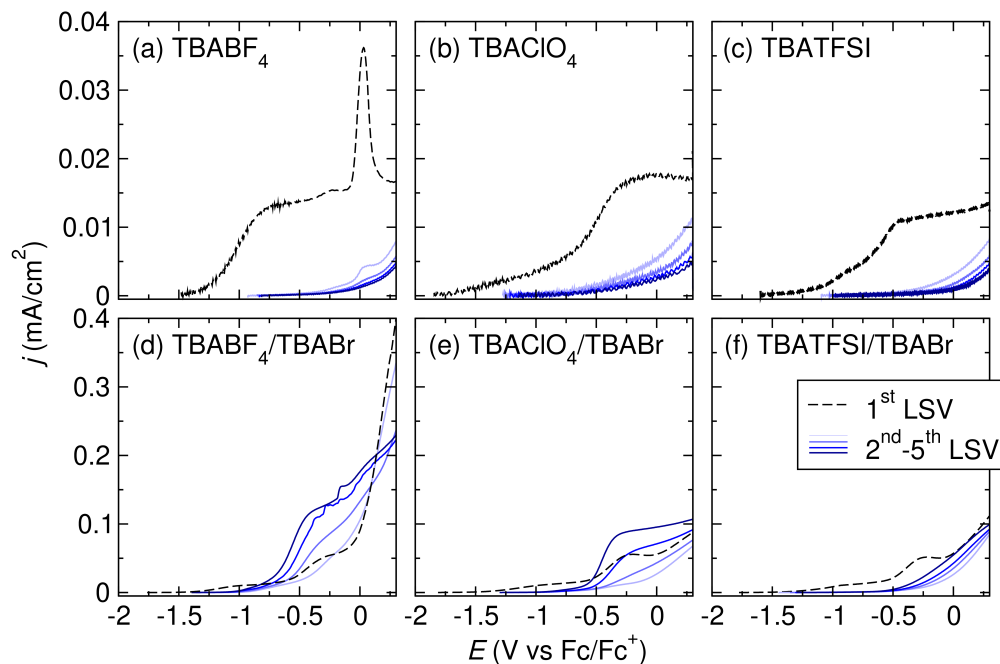

Figure S1: Linear sweep voltammograms of Al stripping in THF with 0.1 M TBA<sup>+</sup> supporting electrolyte or 0.05 M TBA<sup>+</sup> supporting electrolyte of interest + 0.05 M TBABr . All voltammograms were collected at a scan rate of 5 mV s<sup>-1</sup> with 85% iR compensation. For each electrolyte, five LSVs were collected with a 10 min OCV between scans.

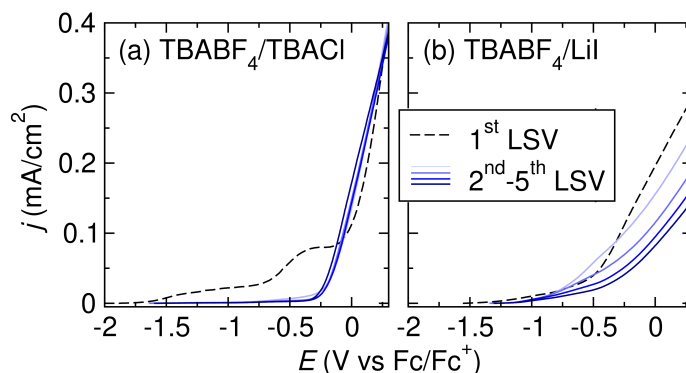

Figure S2: Linear sweep voltammograms of Al stripping in THF with 0.05 M TBABF<sub>4</sub> + 0.05 M TBACl or TBAI . All voltammograms were collected at a scan rate of 5 mV s<sup>-1</sup> with 85% iR compensation. For each electrolyte, five LSVs were collected with a 10 min OCV between scans.

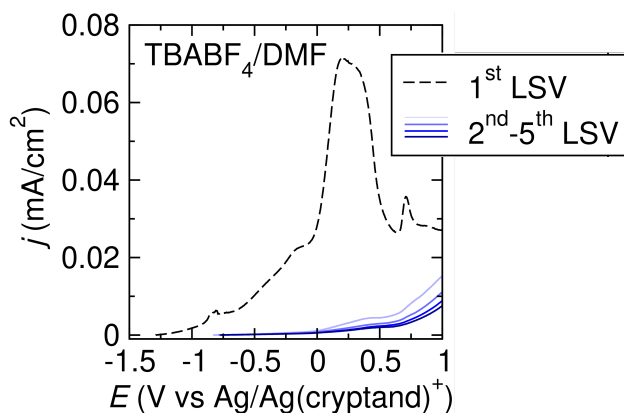

Figure S3: Linear sweep voltammograms of Al stripping in DMF with 0.1 M TBABF<sub>4</sub>. All voltammograms were collected at a scan rate of 5 mV s<sup>-1</sup>. Five LSVs were collected with a 10 min OCV between scans.

### Fc/Fc<sup>+</sup> vs Ag/Ag(cryptand)<sup>+</sup> RE

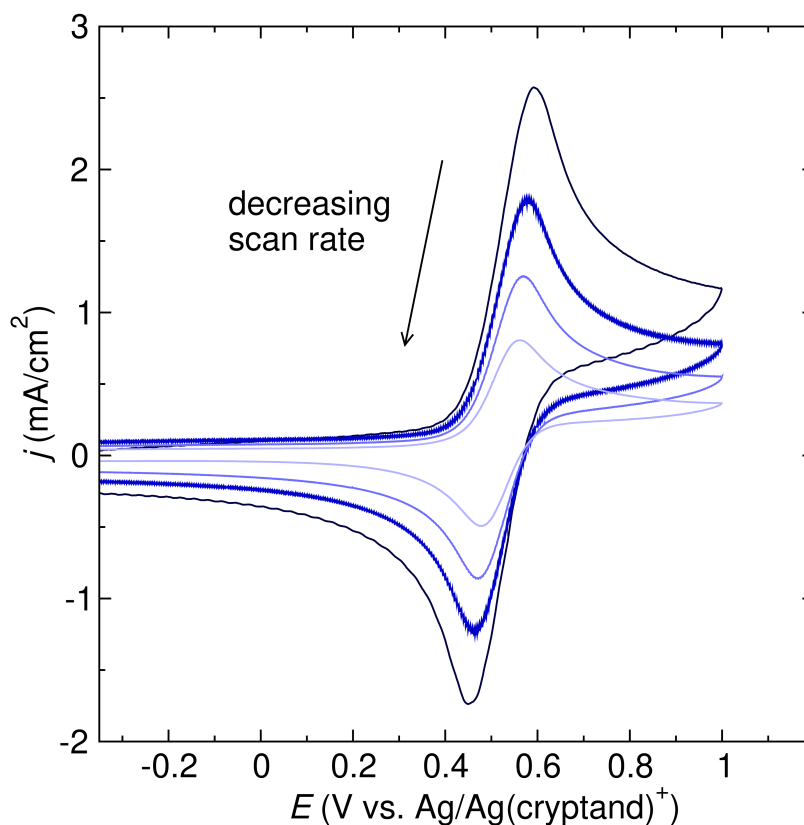

Figure S4: Cyclic voltammograms of Fc in 0.1 M TBAPF<sub>6</sub>/THF. WE: Pt disk, CE: Pt wire, RE: Ag/Ag(cryptand)<sup>+</sup>. The voltammograms are collected at 200, 100, 50, and 20 mV s<sup>-1</sup> scan rate without iR compensation.

### EIS data

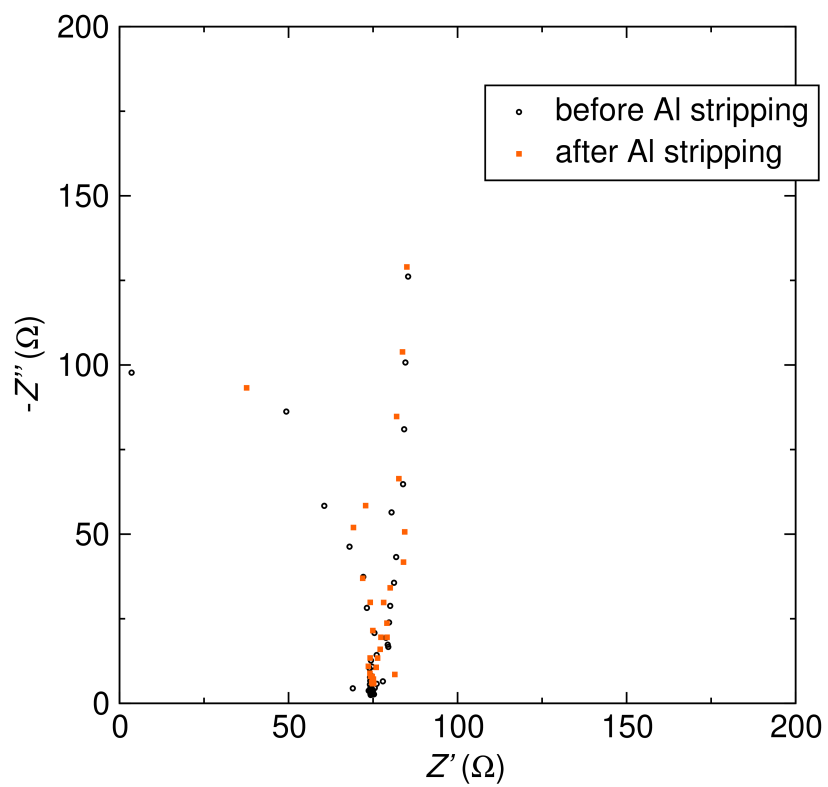

Figure S5: EIS of the Al working electrodes before and after galvanostatic Al stripping in the presence of 0.5 M *t*BuBr in 0.5 M TBABF<sub>4</sub> electrolyte.

## XPS data

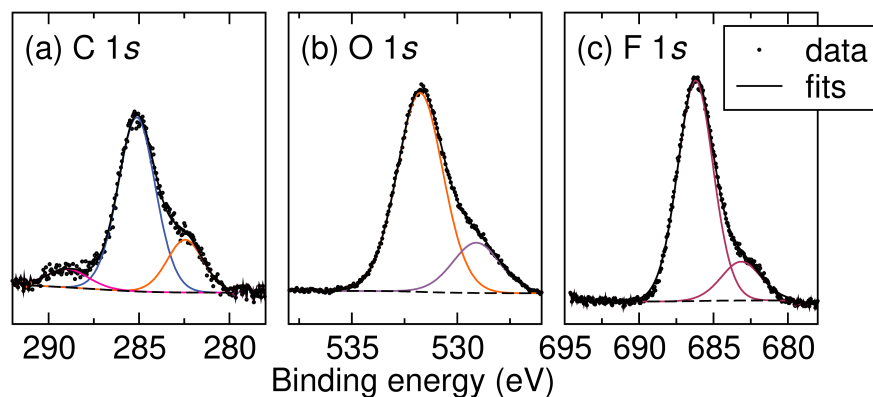

Figure S6: X-ray photoelectron spectra of Al electrodes after the LSV experiments in THF with TBABF<sub>4</sub> as the supporting electrolyte.

Table S1: Peak assignments of the X-ray photoelectron spectra of Al electrodes after the LSV experiments in THF with TBAClO<sub>4</sub> as the supporting electrolyte.

| Figure           | Peak binding energy (eV) | Assignment                     |
|------------------|--------------------------|--------------------------------|
| Figure 3a. Al 2p | 72.5                     | Al <sup>0</sup>                |
|                  | 75.1                     | Al <sub>2</sub> O <sub>3</sub> |
|                  | 76.7                     | AlF <sub>x</sub>               |
| Figure S6a. C 1s | 282.5                    | C–O                            |
|                  | 285.1                    | adventitious C                 |
|                  | 288.9                    | C=O                            |
| Figure S6b. O 1s | 529.1                    | Al <sub>2</sub> O <sub>3</sub> |
|                  | 531.8                    | C–O                            |
| Figure S6c. F 1s | 683.1, 686.2             | AlF <sub>x</sub>               |

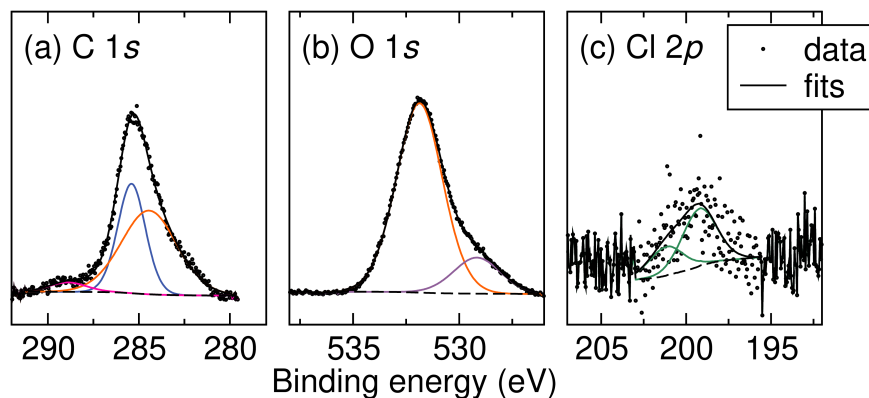

Figure S7: X-ray photoelectron spectra of Al electrodes after the LSV experiments in THF with TBAClO<sub>4</sub> as the supporting electrolyte.

Table S2: Peak assignments of the X-ray photoelectron spectra of Al electrodes after the LSV experiments in THF with TBABF<sub>4</sub> as the supporting electrolyte.

| Figure            | Peak binding energy (eV) | Assignment                     |
|-------------------|--------------------------|--------------------------------|
| Figure 3b. Al 2p  | 72.5                     | Al <sup>0</sup>                |
|                   | 75.0                     | Al <sub>2</sub> O <sub>3</sub> |
| Figure S7a. C 1s  | 284.1                    | C–O                            |
|                   | 285.4                    | adventitious C                 |
|                   | 288.9                    | C=O                            |
| Figure S7b. O 1s  | 529.2                    | Al <sub>2</sub> O <sub>3</sub> |
|                   | 531.9                    | C–O                            |
| Figure S7c. Cl 2p | 199.2                    | AlCl <sub>x</sub>              |

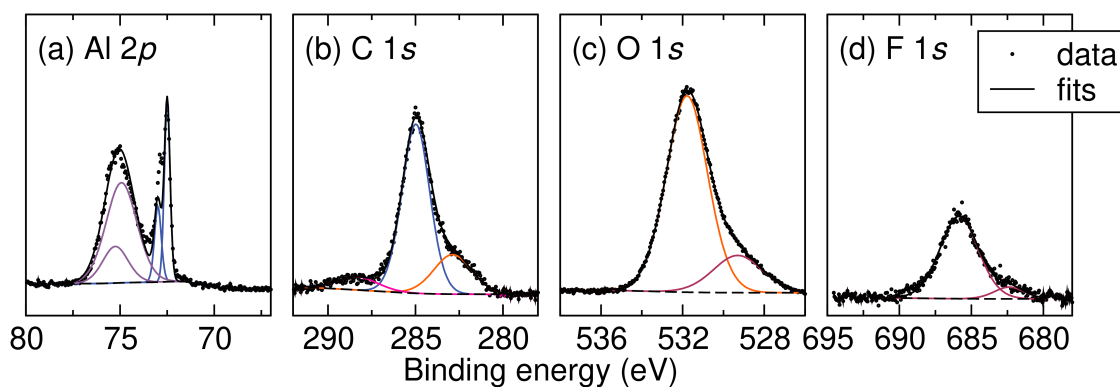

Figure S8: X-ray photoelectron spectra of Al electrodes after the LSV experiments in THF with TBATFSI as the supporting electrolyte.

Table S3: Peak assignments of the X-ray photoelectron spectra of Al electrodes after the LSV experiments in THF with TBATFSI as the supporting electrolyte.

| Figure                    | Peak binding energy (eV) | Assignment                     |
|---------------------------|--------------------------|--------------------------------|
| Figure S8a. Al 2 <i>p</i> | 72.5                     | Al <sup>0</sup>                |
|                           | 75.0                     | Al <sub>2</sub> O <sub>3</sub> |
| Figure S8b. C 1 <i>s</i>  | 282.9                    | C–O                            |
|                           | 285.0                    | adventitious C                 |
|                           | 288.3                    | C=O                            |
| Figure S8c. O 1 <i>s</i>  | 529.3                    | Al <sub>2</sub> O <sub>3</sub> |
|                           | 531.8                    | C–O                            |
| Figure S8d. F 1 <i>s</i>  | 682.4, 685.9             | AlF <sub><i>x</i></sub>        |

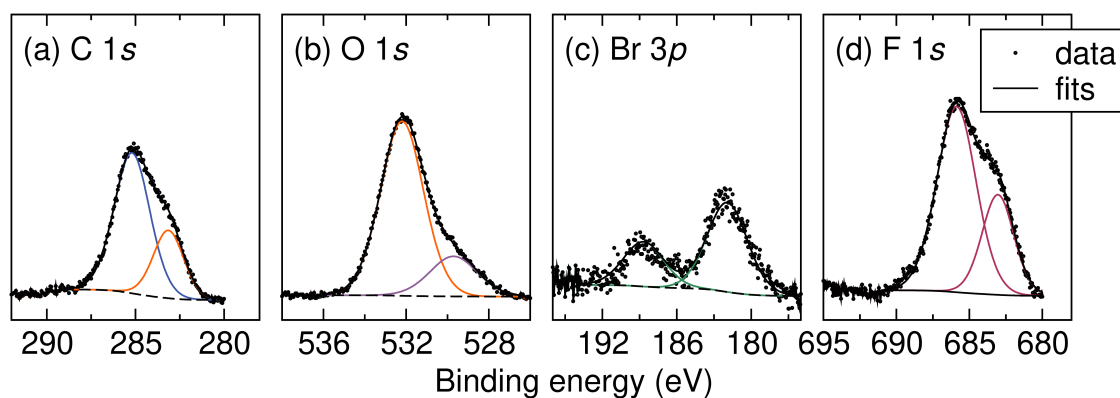

Figure S9: X-ray photoelectron spectra of Al electrodes after the LSV experiments in THF with TBABF<sub>4</sub>/TBABr as the supporting electrolyte.

Table S4: Peak assignments of the X-ray photoelectron spectra of Al electrodes after the LSV experiments in THF with TBABF<sub>4</sub>/TBABr as the supporting electrolyte.

| Figure                    | Peak binding energy (eV) | Assignment                     |
|---------------------------|--------------------------|--------------------------------|
| Figure 3c. Al 2 <i>p</i>  | 72.5                     | Al <sup>0</sup>                |
|                           | 73.9                     | AlBr <sub>3</sub>              |
|                           | 75.0                     | Al <sub>2</sub> O <sub>3</sub> |
| Figure 3c. Br 3 <i>d</i>  | 68.4                     | AlBr <sub>3</sub>              |
| Figure S9a. C 1 <i>s</i>  | 283.1                    | C–O                            |
|                           | 285.2                    | adventitious C                 |
| Figure S9b. O 1 <i>s</i>  | 529.7                    | Al <sub>2</sub> O <sub>3</sub> |
|                           | 532.2                    | C–O                            |
| Figure S9c. Br 3 <i>p</i> | 181.9                    | AlBr <sub>3</sub>              |
| Figure S9d. F 1 <i>s</i>  | 683.0, 685.9             | AlF <sub><i>x</i></sub>        |



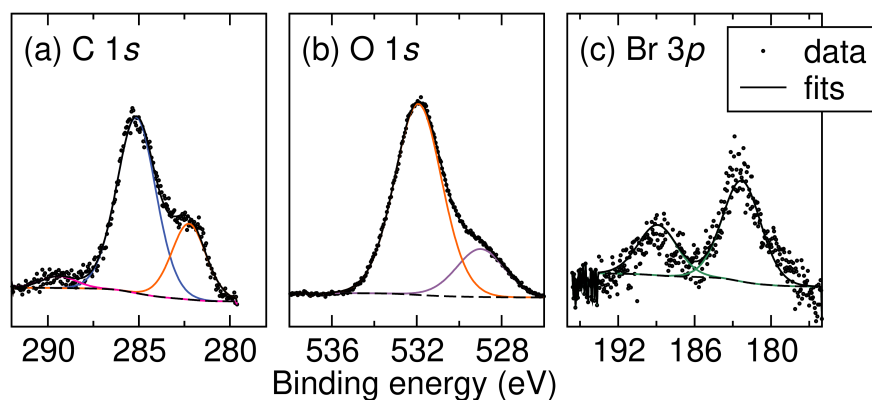

Figure S10: X-ray photoelectron spectra of Al electrodes after the LSV experiments in THF with TBAClO<sub>4</sub>/TBABr as the supporting electrolyte.

Table S5: Peak assignments of the X-ray photoelectron spectra of Al electrodes after the LSV experiments in THF with TBAClO<sub>4</sub>/TBABr as the supporting electrolyte.

| Figure                     | Peak binding energy (eV) | Assignment                     |
|----------------------------|--------------------------|--------------------------------|
| Figure 3d. Al 2 <i>p</i>   | 72.5                     | Al <sup>0</sup>                |
|                            | 73.8                     | AlBr <sub>3</sub>              |
|                            | 75.1                     | Al <sub>2</sub> O <sub>3</sub> |
| Figure 3d. Br 3 <i>d</i>   | 68.8                     | AlBr <sub>3</sub>              |
| Figure S10a. C 1 <i>s</i>  | 282.2                    | C–O                            |
|                            | 285.1                    | adventitious C                 |
|                            | 289.4                    | C=O                            |
| Figure S10b. O 1 <i>s</i>  | 529.7                    | Al <sub>2</sub> O <sub>3</sub> |
|                            | 532.2                    | C–O                            |
| Figure S10c. Br 3 <i>p</i> | 182.3                    | AlBr <sub>3</sub>              |

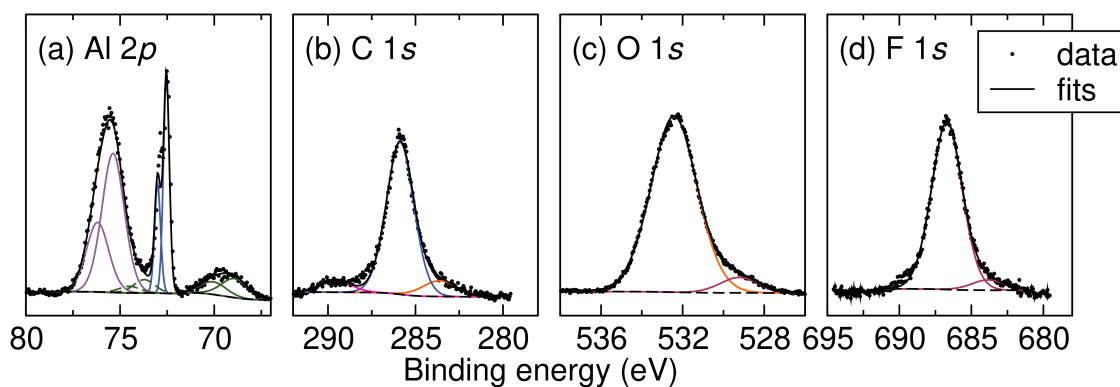

Figure S11: X-ray photoelectron spectra of Al electrodes after the LSV experiments in THF with TBATFSI/TBABr as the supporting electrolyte.

Table S6: Peak assignments of the X-ray photoelectron spectra of Al electrodes after the LSV experiments in THF with TBATFSI/TBABr as the supporting electrolyte.

| Figure               | Peak binding energy (eV) | Assignment                     |
|----------------------|--------------------------|--------------------------------|
| Figure S13a. Al $2p$ | 72.5                     | Al <sup>0</sup>                |
|                      | 73.7                     | AlBr <sub>3</sub>              |
|                      | 75.4                     | Al <sub>2</sub> O <sub>3</sub> |
| Figure S13a. Br $3d$ | 68.9                     | AlBr <sub>3</sub>              |
| Figure S13b. C $1s$  | 283.6                    | C–O                            |
|                      | 285.8                    | adventitious C                 |
|                      | 289.6                    | C=O                            |
| Figure S13c. O $1s$  | 529.2                    | Al <sub>2</sub> O <sub>3</sub> |
|                      | 532.4                    | C–O                            |
| Figure S13d. F $1s$  | 683.8, 686.7             | AlF <sub>x</sub>               |

## NMR data

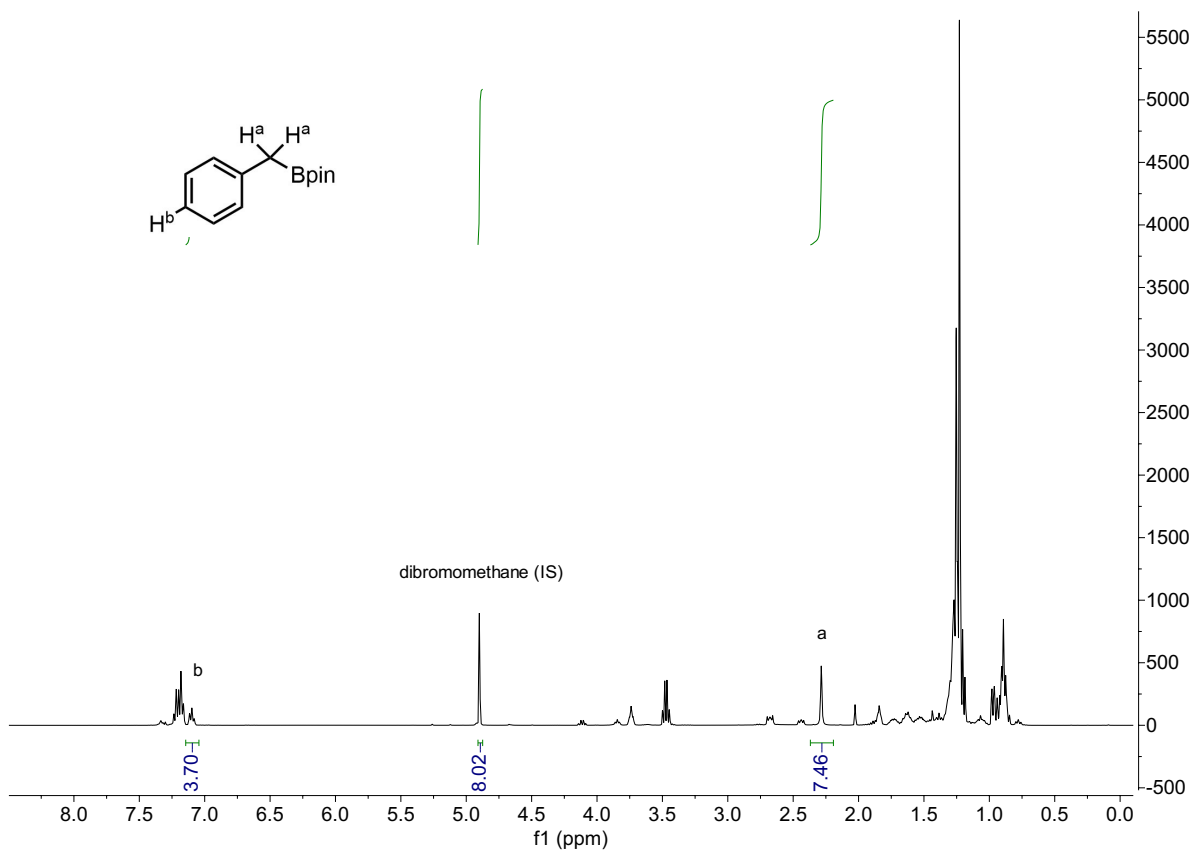

Figure S12: An example of the  $^1\text{H}$ -NMR spectra of the borylation reaction crude mixture.

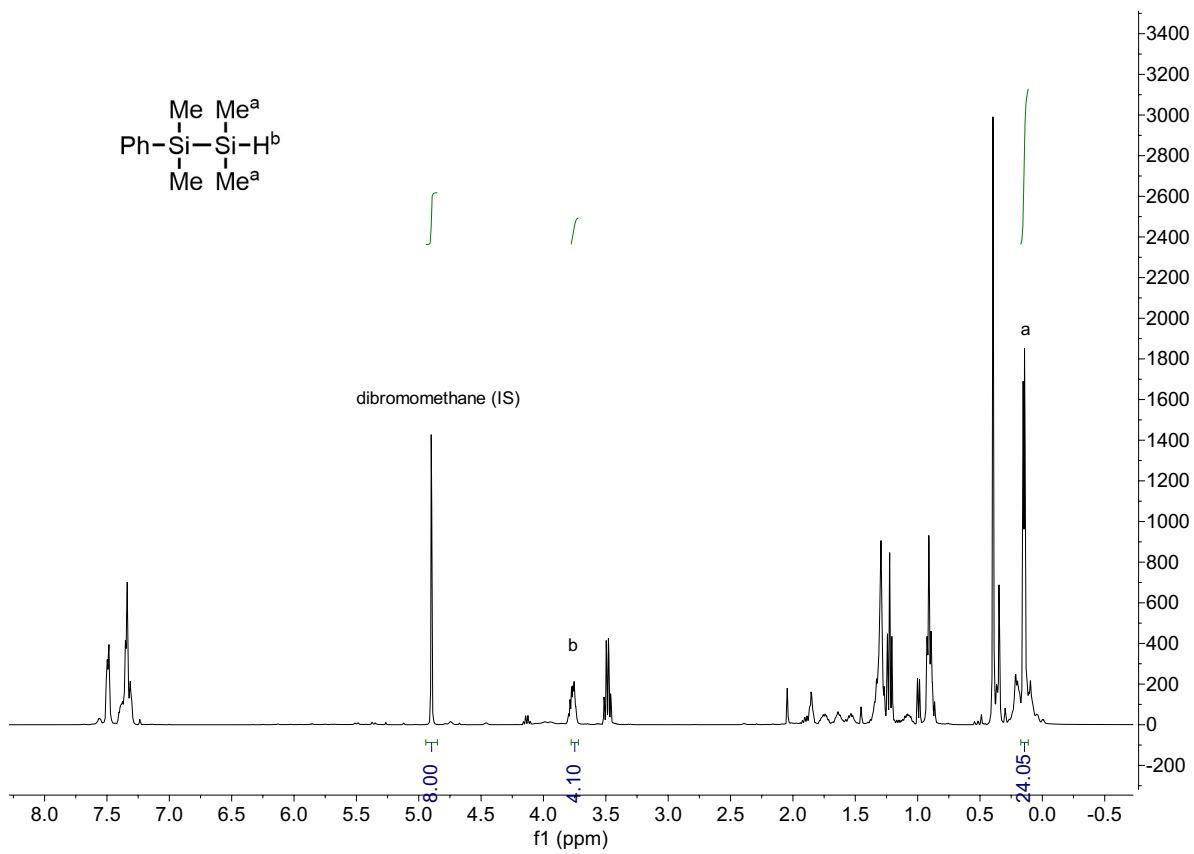

Figure S13: An example of the  $^1\text{H}$ -NMR spectra of the silylation reaction crude mixture.
